# Supplementary material
Source: ML conference proceedings conference paper supplement (https://openreview.net/forum?id=sRKNkpUMQNr)
Supplement: supplementary_material [file attachment]

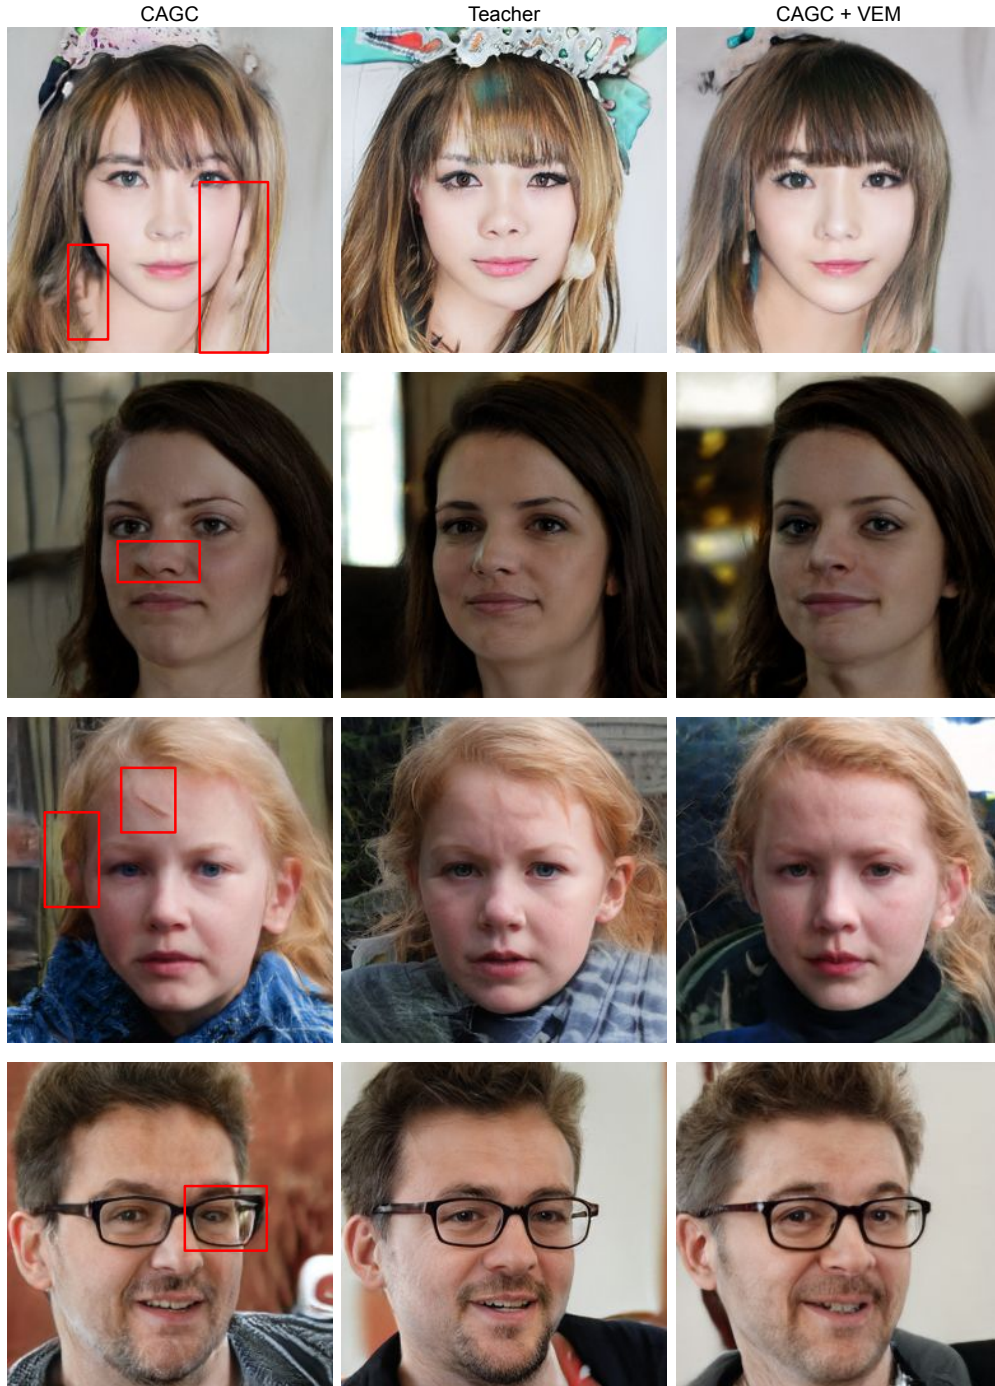

Figure 13: Qualitative results of StyleGAN2 on the FFHQ dataset using CAGC and VEM (ours). The hair of the first person contain artifacts in CAGC, and the nose shape of the second person generated by CAGC look weird. Also, the right ear and hair in the middle of the forehead are unnatural in CAGC of the third row. The left eye looks strange in the last face generated by CAGC.

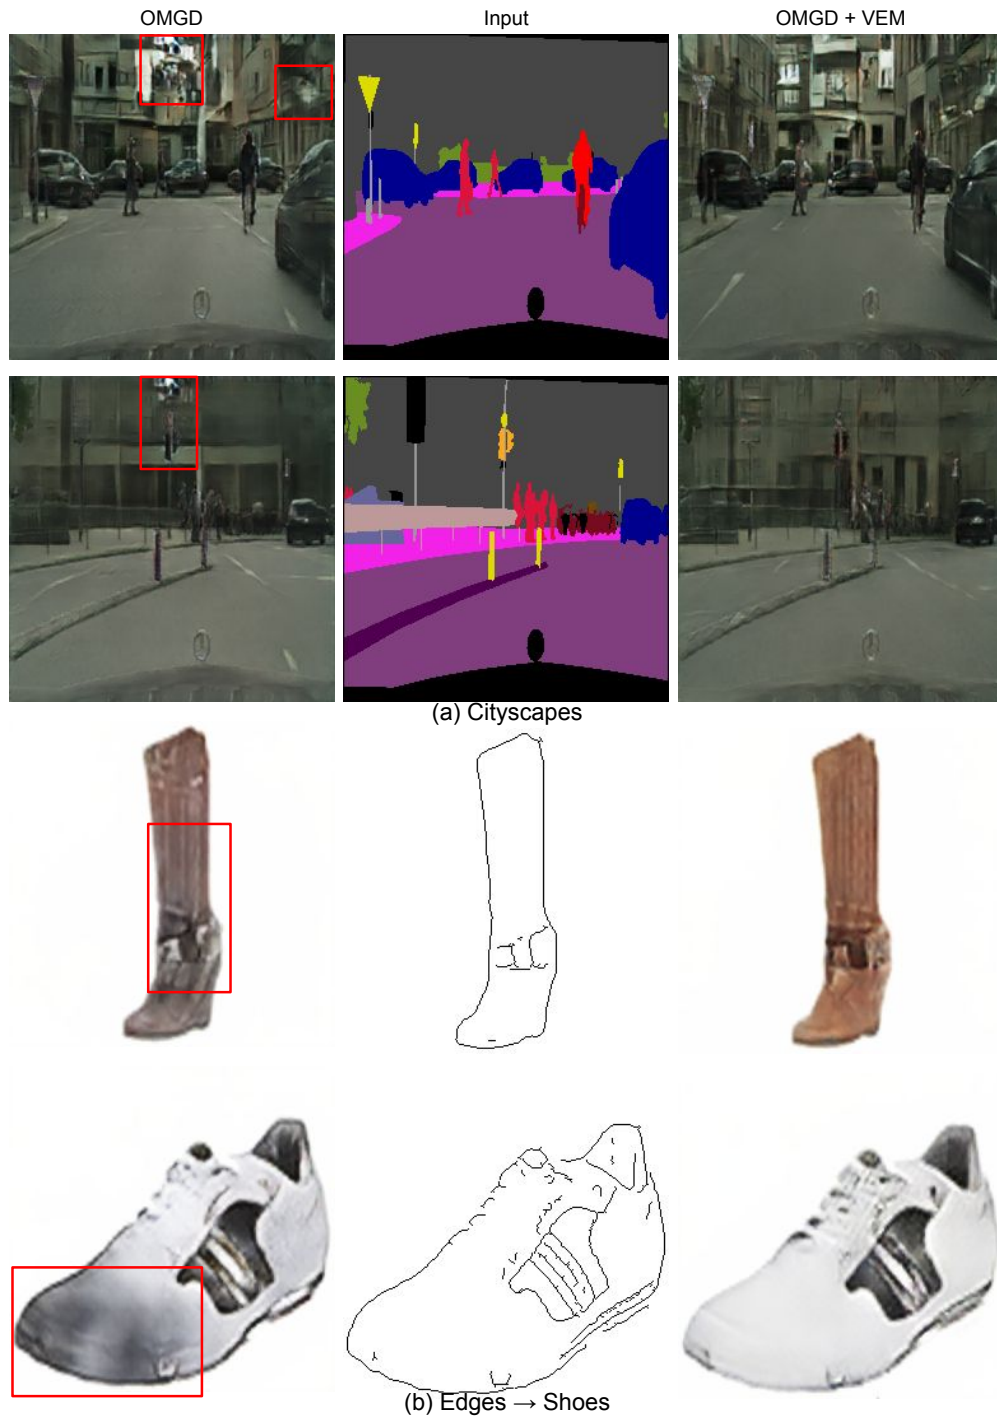

Figure 14: Qualitative results of Pix2Pix on the Cityscapes and Edges  $\rightarrow$  Shoes datasets using OMGD and VEM (ours). The strange artifacts are presented in OMGD in (a) while the unnatural structure and color are given in OMGD in (b).



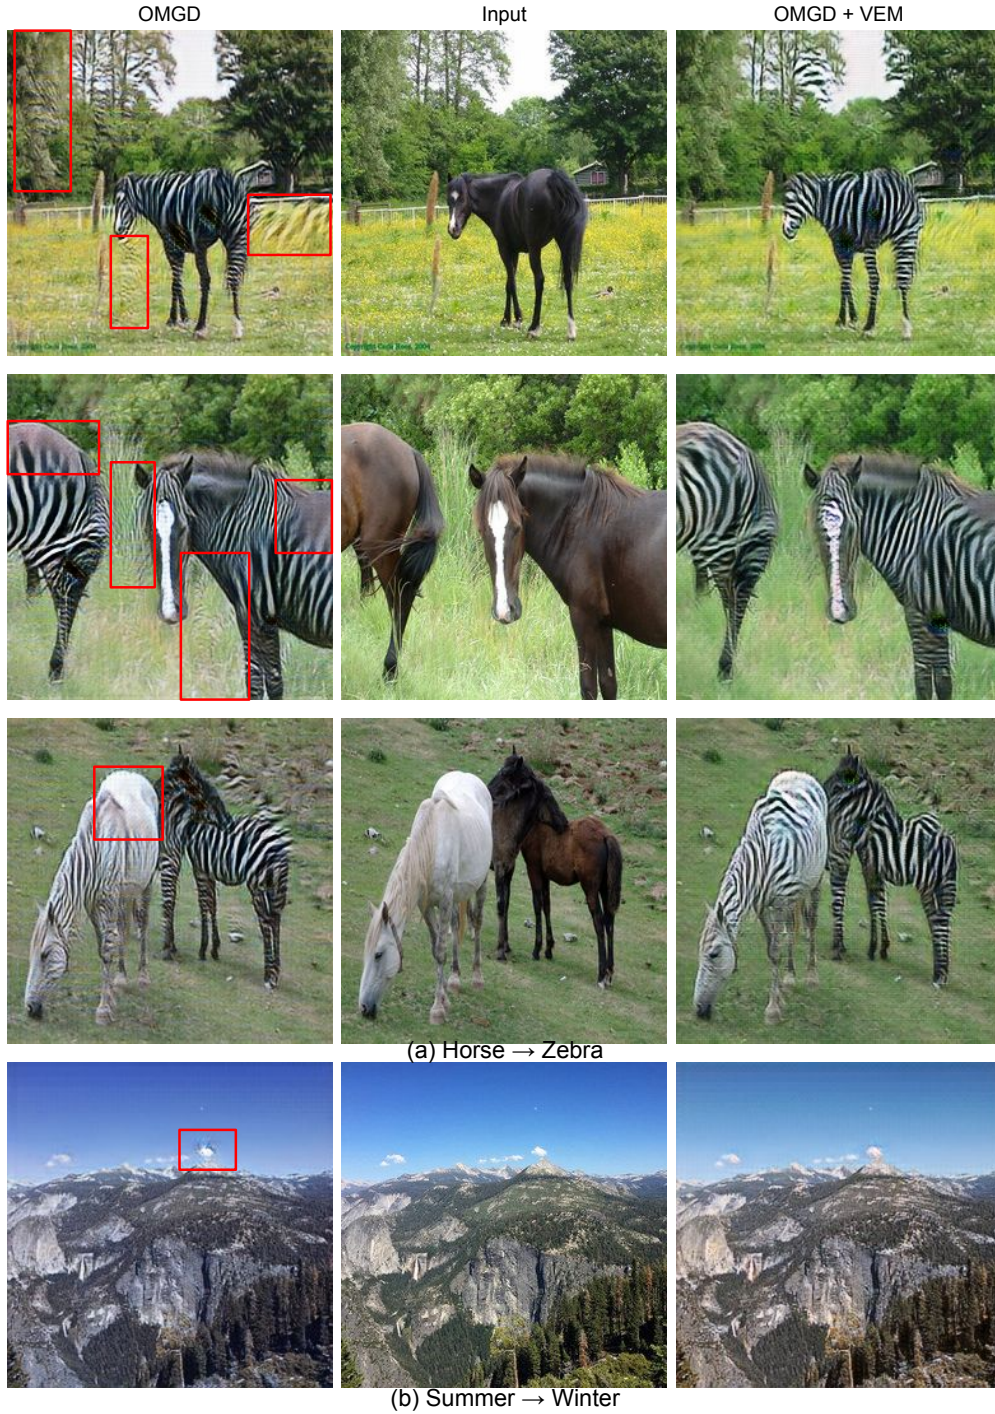

Figure 15: Qualitative results of CycleGAN on the Horse → Zebra and Summer → Winter datasets using OMGD and VEM (ours). In (a), OMGD generates the wiggling patterns around the border between zebra and background and even outside zebras (in the first and second examples) while some parts of zebra in the generated image by OMGD do not have the black-and-white patterns (in the second and third examples). In (b), there exists a strong artifact in the image given by OMGD.
